# Supplementary material for: Disentangling the link between supplemental feeding, population density, and the prevalence of pathogens in urban stray cats
Source: PeerJ. 2018 Jun 25;6:e4988. doi: 10.7717/peerj.4988 (PMC6022734; doi:10.7717/peerj.4988)
Supplement: Supplemental Information 2 [file peerj-06-4988-s002.xlsx]

## Sheet: raw data_cca_pathogen infection
ID	district	sex	pd	cca	FIV	FeLV	hemoplasma	Bh	Tg	FPV	FHV	FCV
DDM1	DDM (L)	f	172	L	0	0	1	0	0	1	1	1
DDM2	DDM (L)	m	172	L	0	0	1	0	0	1	1	1
DDM3	DDM (L)	f	172	L	0	0	1	0	0	1	1	1
DDM4	DDM (L)	f	172	L	0	0	0	1	0	1	1	1
DDM5	DDM (L)	f	172	L	0	0	1	1	0	1	1	1
DDM6	DDM (L)	m	172	L	0	0	1	0	0	1	1	1
DDM7	DDM (L)	f	172	L	0	0	0	0	0	1	1	1
DDM8	DDM (L)	f	172	L	0	0	0	1	0	1	1	1
DDM9	DDM (L)	f	172	L	0	1	1	1	1	1	1	1
DDM10	DDM (L)	f	172	L	0	1	0	0	0	1	1	1
DDM11	DDM (L)	m	172	L	0	0	0	0	0	1	1	1
DDM12	DDM (L)	m	172	L	0	0	0	0	0	1	1	1
DDM13	DDM (L)	f	172	L	0	0	0	0	0	1	1	1
DDM14	DDM (L)	m	172	L	0	0	1	0	0	1	1	1
DDM15	DDM (L)	m	172	L	0	0	0	1	0	1	1	1
DDM16	DDM (L)	m	172	L	0	1	0	0	0	1	1	1
DDM17	DDM (L)	f	172	L	1	0	0	0	0	0	1	1
DDM18	DDM (L)	f	172	L	0	0	0	0	0	1	1	1
DDM19	DDM (L)	f	172	L	0	1	0	0	0	1	1	1
DDM20	DDM (L)	f	172	L	0	1	0	0	0	1	1	1
DDM21	DDM (L)	m	172	L	1	0	0	0	0	1	1	1
DDM22	DDM (L)	m	172	L	0	1	0	0	0	1	1	1
DDM23	DDM (L)	f	172	L	0	0	0	0	0	1	1	1
DDM24	DDM (L)	f	172	L	0	0	0	1	0	1	1	1
DDM25	DDM (L)	m	172	L	0	0	0	0	0	1	1	1
DDM26	DDM (L)	f	172	L	0	0	0	0	0	1	1	1
DDM27	DDM (L)	f	172	L	0	0	0	1	0	1	1	1
DDM28	DDM (L)	m	172	L	0	0	1	1	0	1	1	1
DDM29	DDM (L)	f	172	L	0	0	0	0	0	1	1	1
DDM30	DDM (L)	m	172	L	0	0	0	0	0	1	1	1
DDM31	DDM (L)	f	172	L	0	0	0	0	0	1	1	1
DDM32	DDM (L)	f	172	L	0	1	0	1	0	1	1	1
DDM33	DDM (L)	f	172	L	0	0	0	1	0	0	1	1
DDM34	DDM (L)	m	172	L	0	0	1	0	0	1	1	1
DDM35	DDM (L)	f	172	L	0	0	0	0	1	1	1	1
DDM36	DDM (L)	f	172	L	0	1	0	0	0	1	1	1
DDM37	DDM (L)	m	172	L	0	0	0	0	0	1	1	1
DDM38	DDM (L)	f	172	L	0	0	0	0	0	1	1	1
DDM39	DDM (L)	f	172	L	0	0	1	1	0	1	1	1
DDM40	DDM (L)	f	172	L	0	1	1	1	0	1	1	1
DDM41	DDM (L)	m	172	L	0	0	0	0	0	1	1	1
DDM42	DDM (L)	f	172	L	0	0	1	1	0	1	1	1
DDM43	DDM (L)	m	172	L	0	1	1	1	0	1	1	1
DDM44	DDM (L)	f	172	L	0	0	0	0	0	1	1	1
DDM45	DDM (L)	f	172	L	0	0	0	1	0	1	1	1
DDM46	DDM (L)	m	172	L	0	0	0	1	0	1	1	1
DDM47	DDM (L)	m	172	L	0	0	0	0	0	0	1	1
DDM48	DDM (L)	m	172	L	0	0	1	0	0	1	1	1
DDM49	DDM (L)	f	172	L	0	0	0	0	0	1	1	1
DDM50	DDM (L)	f	172	L	0	0	0	0	0	1	1	1
GC1	GC (L)	f	229	L	0	0	0	1	0	1	1	1
GC2	GC (L)	m	229	L	0	0	0	0	0	0	1	1
GC3	GC (L)	m	229	L	0	0	0	1	0	1	1	1
GC4	GC (L)	m	229	L	1	0	0	1	0	0	1	1
GC5	GC (L)	m	229	L	0	0	0	0	0	0	1	1
GC6	GC (L)	f	229	L	0	0	0	0	0	1	1	1
GC7	GC (L)	f	229	L	0	1	0	0	1	1	1	1
GC8	GC (L)	f	229	L	0	0	0	0	0	1	1	1
GC9	GC (L)	m	229	L	0	0	1	0	1	1	1	1
GC10	GC (L)	f	229	L	0	1	0	0	1	1	1	1
GC11	GC (L)	f	229	L	0	0	0	0	0	1	1	1
GC12	GC (L)	f	229	L	0	1	1	1	0	1	1	1
GC13	GC (L)	f	229	L	0	0	1	0	0	1	1	1
GC14	GC (L)	f	229	L	0	0	0	1	0	1	1	1
GC15	GC (L)	f	229	L	0	0	0	1	0	1	1	1
GC16	GC (L)	m	229	L	0	0	0	0	0	0	1	1
GC17	GC (L)	m	229	L	0	0	0	0	0	1	1	1
GC18	GC (L)	m	229	L	0	0	1	1	0	1	1	1
GC19	GC (L)	f	229	L	0	0	0	1	0	1	1	1
GC20	GC (L)	m	229	L	0	0	1	1	0	1	1	1
GC21	GC (L)	m	229	L	0	0	0	1	0	1	1	1
GC22	GC (L)	f	229	L	0	0	0	0	0	1	1	1
GC23	GC (L)	f	229	L	0	1	0	0	0	1	1	1
GC24	GC (L)	m	229	L	0	0	1	1	0	1	1	1
GC25	GC (L)	m	229	L	0	0	1	0	0	1	1	1
GC26	GC (L)	f	229	L	0	0	1	0	1	1	1	1
GC27	GC (L)	m	229	L	0	0	1	1	0	1	1	1
GC28	GC (L)	f	229	L	0	0	0	0	0	1	1	1
GC29	GC (L)	m	229	L	0	0	0	0	0	1	1	1
GC30	GC (L)	m	229	L	0	0	1	0	0	1	1	1
GC31	GC (L)	f	229	L	0	0	0	0	1	1	1	1
GC32	GC (L)	f	229	L	0	0	0	1	0	1	1	1
GC33	GC (L)	f	229	L	0	0	0	0	0	1	1	1
GC34	GC (L)	f	229	L	0	1	0	0	0	1	1	1
GC35	GC (L)	m	229	L	0	0	0	0	0	1	1	0
GC36	GC (L)	m	229	L	0	0	1	1	0	1	1	1
GC37	GC (L)	m	229	L	0	0	0	0	0	0	1	1
GC38	GC (L)	f	229	L	0	0	0	0	0	1	1	1
GC39	GC (L)	m	229	L	1	0	1	0	0	1	1	1
GC40	GC (L)	f	229	L	0	0	0	0	0	0	1	1
GC41	GC (L)	m	229	L	0	0	0	1	0	1	1	0
GC42	GC (L)	m	229	L	0	0	0	0	0	0	1	0
GC43	GC (L)	f	229	L	0	0	0	0	0	1	1	1
GC44	GC (L)	f	229	L	0	0	0	0	0	1	1	1
GC45	GC (L)	m	229	L	0	0	0	1	1	0	1	1
GC46	GC (L)	m	229	L	0	1	0	1	0	0	1	1
GC47	GC (L)	m	229	L	0	0	1	0	0	0	1	0
GC48	GC (L)	m	229	L	0	0	0	0	0	1	1	1
GC49	GC (L)	f	229	L	0	1	0	0	0	1	1	1
GC50	GC (L)	m	229	L	0	0	1	0	0	1	1	1
GN8_1	GN (H)	m	161	H	0	0	0	0	0	0	1	1
GN8_2	GN (H)	m	161	H	0	1	0	1	0	0	1	1
GN8_3	GN (H)	f	161	H	0	0	1	1	1	1	1	1
GN8_4	GN (H)	f	161	H	0	0	0	1	0	1	1	1
GN8_5	GN (H)	m	161	H	0	1	0	1	0		1	1
GN4-1	GN (H)	f	161	H	0	1	0	1	0	1	1	1
GN4-2	GN (H)	f	161	H	0	0	0	0	0	0	1	1
GN4-3	GN (H)	m	161	H	0	1	0	1	0	0	1	1
GN4-4	GN (H)	m	161	H	0	0	0	1	0	0	1	1
GN4-5	GN (H)	m	161	H	0	1	0	0	0	0	1	1
GN4-6	GN (H)	f	161	H	0	1	0	0	0	0	1	1
GN4-7	GN (H)	m	161	H	0	0	0	0	0	0	1	1
GN4-8	GN (H)	m	161	H	0	0	1	1	0	1	1	1
GN4-9	GN (H)	m	161	H	0	0	1	0	0	1	1	1
GN4-10	GN (H)	m	161	H	0	1	0	0	0	1	1	1
GN4-11	GN (H)	m	161	H	0	0	0	0	0	1	1	1
GN4-12	GN (H)	f	161	H	0	1	0	1	0	1	1	1
GN4-13	GN (H)	m	161	H	0	1	0	0	0	1	1	1
GN4-14	GN (H)	m	161	H	0	0	1	0	0	1	1	1
GN4-17	GN (H)	f	161	H	0	0	0	0	0	0	1	1
GN4-18	GN (H)	f	161	H	0	0	0	0	0	0	1	1
GN4-19	GN (H)	f	161	H	0	0	0	0	0	1	1	1
GN4-20	GN (H)	m	161	H	0	0	0	0	0	0	1	1
GN4-21	GN (H)	f	161	H	0	1	1	1	0	1	1	1
GN4-22	GN (H)	f	161	H	0	0	1	1	0	1	1	1
GN4-23	GN (H)	f	161	H	0	0	0	0	1	1	1	1
GN4-24	GN (H)	f	161	H	0	1	1	1	1	1	1	1
GN5-1	GN (H)	f	161	H	0	0	0	1	0	0	1	1
GN5-2	GN (H)	f	161	H	0	1	0	0	0	0	1	1
GN5-3	GN (H)	f	161	H	0	0	1	1	0	1	1	1
GN5-4	GN (H)	m	161	H	0	1	0	0	0	1	1	1
GN5-5	GN (H)	f	161	H	0	1	0	1	0	1	1	1
GN5-6	GN (H)	m	161	H	0	0	1	0	0	1	1	1
GN5-7	GN (H)	m	161	H	0	1	0	0	0	1	1	1
GN5-8	GN (H)	f	161	H	0	1	0	0	0	1	1	1
GN5-9	GN (H)	m	161	H	0	0	1	0	0	1	1	1
GN5-10	GN (H)	m	161	H	0	0	0	0	0	0	1	1
GN5-11	GN (H)	f	161	H	0	0	0	0	0	0	1	1
GN5-12	GN (H)	m	161	H	0	0	0	0	0	0	1	1
GN5-13	GN (H)	f	161	H	0	1	0	1	0	1	1	1
GN5-14	GN (H)	f	161	H	0	0	0	0	0	1	1	1
GN5-15	GN (H)	f	161	H	0	0	0	0	0	0	1	1
GN5-17	GN (H)	m	161	H	0	0	0	0	0	1	1	1
GN5-18	GN (H)	f	161	H	0	1	0	0	0	0	1	1
GN5-19	GN (H)	f	161	H	0	0	0	1	0	0	1	1
GN5-20	GN (H)	m	161	H	0	0	0	1	0	1	1	1
GN5-21	GN (H)	f	161	H	0	1	1	1	0	1	1	1
GN5-22	GN (H)	m	161	H	0	1	0	1	0	0	1	1
GN6-1	GN (H)	f	161	H	0	1	1	0	0	1	1	1
GN6-2	GN (H)	m	161	H	0	0	1	1	0	1	1	1
MP65-1	MP (H)	m	187	H	0	0	1	1	0	1	1	1
MP66-2	MP (H)	m	187	H	0	0	0	0	0	1	1	1
MP1029	MP (H)	m	187	H	0	0	1	1	0	1	1	1
MP1029-1	MP (H)	f	187	H	0	0	0	0	0	1	1	1
MP14115	MP (H)	f	187	H	0	0	1	0	1	1	1	1
MP14116	MP (H)	f	187	H	0	0	0	1	0	1	1	1
MP14116-1	MP (H)	f	187	H	0	0	1	0	0	1	1	1
MP14615	MP (H)	m	187	H	0	0	1	1	0	1	1	1
MP14616	MP (H)	m	187	H	0	0	0	0	0	1	0	1
MP14616-1	MP (H)	m	187	H	0	0	0	1	0	1	0	1
MP14617	MP (H)	m	187	H	0	0	0	0	0	0	1	1
MP14617-1	MP (H)	m	187	H	0	0	0	0	0	0	1	1
MP14617-2	MP (H)	f	187	H	0	0	1	0	1	0	1	1
MP14618	MP (H)	m	187	H	0	0	1	1	0	1	1	1
MP14630	MP (H)	f	187	H	0	0	0	0	0	0	1	1
MP1471-1	MP (H)	f	187	H	0	0	0	0	0	0	1	1
MP1471-2	MP (H)	m	187	H	0	0	1	1	0	0	1	1
MP14711	MP (H)	f	187	H	0	0	0	0	0	1	1	1
MP14711-1	MP (H)	f	187	H	0	0	0	1	0	1	1	1
MP14811	MP (H)	m	187	H	0	0	1	1	0	1	1	1
MP14812	MP (H)	m	187	H	0	0	0	1	0	0	1	0
MP14614	MP (H)	m	187	H	0	0	1	0	0	0	1	1
YN1	MP (H)	f	187	H	0	0	0	0	0	1	1	1
YN2	MP (H)	m	187	H	0	0	1	1	0	1	1	1
YN3	MP (H)	m	187	H	0	1	1	0	0	0	1	1
YN4	MP (H)	m	187	H	0	0	0	0	0	1	1	1
YN5 (141031-1)	MP (H)	m	187	H	0	0	1	0	0	1	1	1
YN6 (141031-2)	MP (H)	m	187	H	0	1	0	1	0	1	1	1
YN7	MP (H)	f	187	H	0	1	1	0	0	1	1	1
YN8	MP (H)	m	187	H	0	0	0	0	0	1	1	1
YN9	MP (H)	m	187	H	0	1	0	0	0	0	1	1
MP_SS1	MP (H)	f	187	H	1	1	1	0		1	1	1
MP_SS2	MP (H)	m	187	H	0	0	0	0	0
MP_SS3	MP (H)	m	187	H	0	0	1	1	0	1	1	1
MP_SS4	MP (H)	f	187	H	1	0	0	1	0	1	1	1
MP_SS5	MP (H)	m	187	H	0	0	1	1	0	1	1	1
MP_SS6	MP (H)	m	187	H	0	0	1	0	0	1	1	1
MP_SS7	MP (H)	f	187	H	0	0	0	1	0	0	1	1
MP_SS10	MP (H)	m	187	H	0	0	1	1	0	1	1	1
MP_SS11	MP (H)	m	187	H	0	0	1	1	1	1	1	1
MP_SS13	MP (H)	m	187	H	0	0	1	0	0	1	1	1
MP_SS14	MP (H)	f	187	H	0	0	0	0	0	1	1	1
MP_SS15	MP (H)	m	187	H	0	0	1	1	0	1	1	1
MP_SS16	MP (H)	m	187	H	0	0	1	1	0	1	1	1
MP150611	MP (H)	m	187	H	0	0	0	0	0	0	1	1
150711-1	MP (H)	f	187	H	0	0	0	1	0	1	1	1
150711-2	MP (H)	m	187	H	1	0	1	0	0	1	1	1
150711-3	MP (H)	f	187	H	0	0	0	0	0	1	1	1
MW-1	MP (H)	f	187	H	0	0	0	0		1	1	1
MW-2	MP (H)	f	187	H	0	1	0	0	0	1	1	1
SC1	SC (H)	f	211	H	0	0	1	0	0	1	1	1
SC3	SC (H)	f	211	H	0	1	0	0	0	1	1	1
SC4	SC (H)	m	211	H	0	0	0	0	0	1	1	1
SC7	SC (H)	m	211	H	0	0	0	0	0	1	1	1
SC9	SC (H)	m	211	H	0	0	1	0	0	1	1	1
SC10	SC (H)	f	211	H	0	0	1	1	0	1	1	1
SC11	SC (H)	f	211	H	0	0	1	0	0	1	1	1
SC418-1	SC (H)	f	211	H	0	1	0	0	0	0	1	0
SC418-2	SC (H)	f	211	H	0	0	0	1	0	0	1	0
SC421-1	SC (H)	m	211	H	0	1	0	0	0	1	1	1
SC421-2	SC (H)	f	211	H	0	0	1	0	0	1	1	1
SC422-1	SC (H)	m	211	H	0	1	0	0	0	0	1	1
SC424-1	SC (H)	f	211	H	0	1	1	0	0	1	1	1
SC424-2	SC (H)	f	211	H	0	0	0	1	0	1	1	1
SC424-3	SC (H)	f	211	H	0	0	0	1	0	0	1	1
SC425-1	SC (H)	m	211	H	0	0	0	0	0	0	1	1
SC428-1	SC (H)	m	211	H	0	1	0	0	0	1	1	1
SC429-1	SC (H)	m	211	H	0	0	0	0	0	1	1	1
SC429-2	SC (H)	f	211	H	0	0	0	0	0	1	1	1
SC429-3	SC (H)	m	211	H	0	0	0	1	0	0	1	1
SC050901	SC (H)	f	211	H	0	0	1	0	0	1	1	1
SC-H1	SC (H)	m	211	H	0	0	0	0	0	1	1	1
SC-H2	SC (H)	f	211	H	0	0	0	1	0	1	1	1
SC150529_1	SC (H)	m	211	H	0	0	0	1	0	1	1	1
SC-H3	SC (H)	m	211	H	0	0	1	0	0	1	1	1
SC-H4	SC (H)	f	211	H	0	1	0	1	0	0	1	1
SC-H5	SC (H)	m	211	H	0	0	0	0	0	1	0	1
SC-H6	SC (H)	f	211	H	0	0	0	1	0	0	1	0
SC-H7	SC (H)	f	211	H	0	1	0	0	0	1	1	1
SC-H8	SC (H)	f	211	H	1	1	0	1	1	1	1	1
SC-H9	SC (H)	f	211	H	1	1	0	0	1	0	1	1
SC150703	SC (H)	f	211	H	0	0	0	0	0	1	0	1
BB001	SC (H)	m	211	H	0	0	1	0	0	1	1	1
BB002	SC (H)	m	211	H	0	1	1	0	0	1	1	1
BB003	SC (H)	m	211	H	0	0	1	1	0	1	0	1
BB004	SC (H)	m	211	H	0	0	1	1	0	1	1	1
BB005	SC (H)	m	211	H	0	0	0
BB006	SC (H)	m	211	H	0	0	1	1	0	1	1	1
BB007	SC (H)	f	211	H	0	1	0	0	0	1	1	1
BB008	SC (H)	m	211	H	0	0	1	1	0	1	1	1
BB009	SC (H)	m	211	H	0	0	1	0	1	1	1	1
BB010	SC (H)	m	211	H	0	0	0	0	0	0	1	1
SC-718-1	SC (H)	f	211	H	0	0	1	0	0	1	1	1
SC-718-2	SC (H)	f	211	H	1	1	0	1	0	0	1	0
SC-150731-1	SC (H)	m	211	H	0	1	0	0	0	0	1	1
SC-150731-2	SC (H)	m	211	H	0	1	1	0	0	1	1	1
SC-150731-3	SC (H)	f	211	H	0	0	0	0	0	1	1	1
YG1	SC (H)	f	211	H	0	1	1	0	0	1	1	1
YG2	SC (H)	m	211	H	0	1	1	0	0	1	1	1
YG3	SC (H)	m	211	H	0	0	0	0	0	1	1	1
YG4	SC (H)	m	211	H	0	1	0	0	0	1	1	1
SD-1105	SD (L)	f	273	L	0	0	1	1	1	1	1	1
SD-KM1103	SD (L)	f	273	L	0	0	0	0	0	1	1	1
sd26	SD (L)	f	273	L	0	1	0	0	0	1	1	1
sd27	SD (L)	f	273	L	0	0	0	1	0	1	1	1
sd28	SD (L)	f	273	L	0	1	1	0	0	1	1	1
sd30	SD (L)	f	273	L	0	0	0	1	0	0	1	1
sd31	SD (L)	f	273	L	0	0	0	0	0	1	1	1
SD32	SD (L)	f	273	L	0	0	1	0	1	1	1	1
SD33	SD (L)	m	273	L	0	0	0	0	1	0	1	1
SD34	SD (L)	m	273	L	0	0	1	1	0	1	1	1
SD35	SD (L)	m	273	L	0	0	1	0	0	1	1	1
SD36	SD (L)	f	273	L	0	0	0	0	0	1	1	1
SD37	SD (L)	f	273	L	0	1	0	0	0	1	1	1
SD38	SD (L)	m	273	L	0	0	0	0	0	1	1	1
SD39	SD (L)	m	273	L	0	1	0	1	0	1	1	1
SD40	SD (L)	f	273	L	0	1	0	0	0	1	1	1
SD41	SD (L)	m	273	L	0	0	0	0	0	1	1	1
SD42	SD (L)	m	273	L	0	0	1	0	0	1	1	1
SD57	SD (L)	f	273	L	0	0	0	0	0	1	1	1
SD60	SD (L)	f	273	L	0	0	1	1	0	1	1	1
SD61	SD (L)	m	273	L	0	0	1	0	0	1	1	1
SD63	SD (L)	f	273	L	0	0	0	0	0	1	1	1
SD64	SD (L)	m	273	L	1	0	0	0	0	1	1	0
SD65	SD (L)	m	273	L	0	0	0	0	0	1	1	1
SD66	SD (L)	f	273	L	0	0	0	0	0	1	1	0
SD67	SD (L)	f	273	L	0	0	1	0	0	0	1	1
SD68	SD (L)	f	273	L	0	1	0	0	0	1	1	0
SD71	SD (L)	m	273	L	0	0	1	0	1	1	1	0
SD72	SD (L)	m	273	L	0	0	0	0	0	1	1	1
SD73	SD (L)	m	273	L	0	1	0	1	0	1	1	1
SD74	SD (L)	f	273	L	0	0	0	0	0	1	1	1
SD75	SD (L)	m	273	L	0	0	1	0	0	1	1	1
SD76	SD (L)	m	273	L	0	0	0	0	0	1	1	1
SD77	SD (L)	m	273	L	0	0	0	0	0	1	1	1
SD78	SD (L)	m	273	L	0	0	0	0	0	1	1	0
SD79	SD (L)	f	273	L	0	0	0	1	0	1	1	1
SD80	SD (L)	f	273	L	0	0	0	1	0	1	1	1
SD81	SD (L)	m	273	L	0	0	0	1	0	0	1	0
SD82	SD (L)	f	273	L	0	0	0	0	0	1	1	1
SD85	SD (L)	f	273	L	0	0	0	0	0	1	1	1
SD86	SD (L)	m	273	L	0	0	0	0	0	1	1	1
SD87	SD (L)	m	273	L	0	0	0	0	0	0	1	0
SD88	SD (L)	f	273	L	0	0	1	1	1	1	1	1
SD89	SD (L)	m	273	L	0	0	1	0	0	1	1	1
SD90	SD (L)	f	273	L	0	0	0	1	0	1	1	1
SD91	SD (L)	f	273	L	0	0	1	1	0	1	1	1
SD92	SD (L)	f	273	L	0	0	0	1	1	1	1	1
SD93	SD (L)	m	273	L	0	0	0	0	0	1	1	1
SD94	SD (L)	f	273	L	0	0	0	0		1	1	1
SD95	SD (L)	f	273	L	0	0	0	0		1	1	1
SD55	SD (L)	f	273	L	0	1	0	0	0
SD56	SD (L)	f	273	L	0	0	0	1	0

## Sheet: CCA_density_TNR
District	survey site	Population density (pd)	Cat caretaker activity (CCA)	Neutering rate
DDM	DDM2 (L)	175	L	0
DDM	DDM1 (L)	132	L	0.19
GC	GC1 (L)	189	L	0.22
GC	GC2 (L)	206	L	0.08
GN	GN1 (H)	155	H	0.24
GN	GN2 (H)	168	H	0.68
MP	MP1 (H)	166	H	0.14
MP	MP2 (H)	182	H	0.58
SC	SC1 (H)	185	H	0.3
SC	SC2 (H)	172	H	0.22
SD	SD1 (L)	243	L	0
SD	SD2 (L)	268	L	0.1

## Sheet: CCA_pathogen prevalence
cat ID	District (CCA; L-low, H-high)	FIV	FeLV	Hemoplasma	Bartonella henselae	Toxoplasma gondii	Feline parvovirus	Feline herpesvirus	Feline calicivirus
DDM1	DDM (L)	0	0	1	0	0	1	1	1
DDM2	DDM (L)	0	0	1	0	0	1	1	1
DDM3	DDM (L)	0	0	1	0	0	1	1	1
DDM4	DDM (L)	0	0	0	1	0	1	1	1
DDM5	DDM (L)	0	0	1	1	0	1	1	1
DDM6	DDM (L)	0	0	1	0	0	1	1	1
DDM7	DDM (L)	0	0	0	0	0	1	1	1
DDM8	DDM (L)	0	0	0	1	0	1	1	1
DDM9	DDM (L)	0	1	1	1	1	1	1	1
DDM10	DDM (L)	0	1	0	0	0	1	1	1
DDM11	DDM (L)	0	0	0	0	0	1	1	1
DDM12	DDM (L)	0	0	0	0	0	1	1	1
DDM13	DDM (L)	0	0	0	0	0	1	1	1
DDM14	DDM (L)	0	0	1	0	0	1	1	1
DDM15	DDM (L)	0	0	0	1	0	1	1	1
DDM16	DDM (L)	0	1	0	0	0	1	1	1
DDM17	DDM (L)	1	0	0	0	0	0	1	1
DDM18	DDM (L)	0	0	0	0	0	1	1	1
DDM19	DDM (L)	0	1	0	0	0	1	1	1
DDM20	DDM (L)	0	1	0	0	0	1	1	1
DDM21	DDM (L)	1	0	0	0	0	1	1	1
DDM22	DDM (L)	0	1	0	0	0	1	1	1
DDM23	DDM (L)	0	0	0	0	0	1	1	1
DDM24	DDM (L)	0	0	0	1	0	1	1	1
DDM25	DDM (L)	0	0	0	0	0	1	1	1
DDM26	DDM (L)	0	0	0	0	0	1	1	1
DDM27	DDM (L)	0	0	0	1	0	1	1	1
DDM28	DDM (L)	0	0	1	1	0	1	1	1
DDM29	DDM (L)	0	0	0	0	0	1	1	1
DDM30	DDM (L)	0	0	0	0	0	1	1	1
DDM31	DDM (L)	0	0	0	0	0	1	1	1
DDM32	DDM (L)	0	1	0	1	0	1	1	1
DDM33	DDM (L)	0	0	0	1	0	0	1	1
DDM34	DDM (L)	0	0	1	0	0	1	1	1
DDM35	DDM (L)	0	0	0	0	1	1	1	1
DDM36	DDM (L)	0	1	0	0	0	1	1	1
DDM37	DDM (L)	0	0	0	0	0	1	1	1
DDM38	DDM (L)	0	0	0	0	0	1	1	1
DDM39	DDM (L)	0	0	1	1	0	1	1	1
DDM40	DDM (L)	0	1	1	1	0	1	1	1
DDM41	DDM (L)	0	0	0	0	0	1	1	1
DDM42	DDM (L)	0	0	1	1	0	1	1	1
DDM43	DDM (L)	0	1	1	1	0	1	1	1
DDM44	DDM (L)	0	0	0	0	0	1	1	1
DDM45	DDM (L)	0	0	0	1	0	1	1	1
DDM46	DDM (L)	0	0	0	1	0	1	1	1
DDM47	DDM (L)	0	0	0	0	0	0	1	1
DDM48	DDM (L)	0	0	1	0	0	1	1	1
DDM49	DDM (L)	0	0	0	0	0	1	1	1
DDM50	DDM (L)	0	0	0	0	0	1	1	1
GC1	GC (L)	0	0	0	1	0	1	1	1
GC2	GC (L)	0	0	0	0	0	0	1	1
GC3	GC (L)	0	0	0	1	0	1	1	1
GC4	GC (L)	1	0	0	1	0	0	1	1
GC5	GC (L)	0	0	0	0	0	0	1	1
GC6	GC (L)	0	0	0	0	0	1	1	1
GC7	GC (L)	0	1	0	0	1	1	1	1
GC8	GC (L)	0	0	0	0	0	1	1	1
GC9	GC (L)	0	0	1	0	1	1	1	1
GC10	GC (L)	0	1	0	0	1	1	1	1
GC11	GC (L)	0	0	0	0	0	1	1	1
GC12	GC (L)	0	1	1	1	0	1	1	1
GC13	GC (L)	0	0	1	0	0	1	1	1
GC14	GC (L)	0	0	0	1	0	1	1	1
GC15	GC (L)	0	0	0	1	0	1	1	1
GC16	GC (L)	0	0	0	0	0	0	1	1
GC17	GC (L)	0	0	0	0	0	1	1	1
GC18	GC (L)	0	0	1	1	0	1	1	1
GC19	GC (L)	0	0	0	1	0	1	1	1
GC20	GC (L)	0	0	1	1	0	1	1	1
GC21	GC (L)	0	0	0	1	0	1	1	1
GC22	GC (L)	0	0	0	0	0	1	1	1
GC23	GC (L)	0	1	0	0	0	1	1	1
GC24	GC (L)	0	0	1	1	0	1	1	1
GC25	GC (L)	0	0	1	0	0	1	1	1
GC26	GC (L)	0	0	1	0	1	1	1	1
GC27	GC (L)	0	0	1	1	0	1	1	1
GC28	GC (L)	0	0	0	0	0	1	1	1
GC29	GC (L)	0	0	0	0	0	1	1	1
GC30	GC (L)	0	0	1	0	0	1	1	1
GC31	GC (L)	0	0	0	0	1	1	1	1
GC32	GC (L)	0	0	0	1	0	1	1	1
GC33	GC (L)	0	0	0	0	0	1	1	1
GC34	GC (L)	0	1	0	0	0	1	1	1
GC35	GC (L)	0	0	0	0	0	1	1	0
GC36	GC (L)	0	0	1	1	0	1	1	1
GC37	GC (L)	0	0	0	0	0	0	1	1
GC38	GC (L)	0	0	0	0	0	1	1	1
GC39	GC (L)	1	0	1	0	0	1	1	1
GC40	GC (L)	0	0	0	0	0	0	1	1
GC41	GC (L)	0	0	0	1	0	1	1	0
GC42	GC (L)	0	0	0	0	0	0	1	0
GC43	GC (L)	0	0	0	0	0	1	1	1
GC44	GC (L)	0	0	0	0	0	1	1	1
GC45	GC (L)	0	0	0	1	1	0	1	1
GC46	GC (L)	0	1	0	1	0	0	1	1
GC47	GC (L)	0	0	1	0	0	0	1	0
GC48	GC (L)	0	0	0	0	0	1	1	1
GC49	GC (L)	0	1	0	0	0	1	1	1
GC50	GC (L)	0	0	1	0	0	1	1	1
GN8_1	GN (H)	0	0	0	0	0	0	1	1
GN8_2	GN (H)	0	1	0	1	0	0	1	1
GN8_3	GN (H)	0	0	1	1	1	1	1	1
GN8_4	GN (H)	0	0	0	1	0	1	1	1
GN8_5	GN (H)	0	1	0	1	0		1	1
GN4-1	GN (H)	0	1	0	1	0	1	1	1
GN4-2	GN (H)	0	0	0	0	0	0	1	1
GN4-3	GN (H)	0	1	0	1	0	0	1	1
GN4-4	GN (H)	0	0	0	1	0	0	1	1
GN4-5	GN (H)	0	1	0	0	0	0	1	1
GN4-6	GN (H)	0	1	0	0	0	0	1	1
GN4-7	GN (H)	0	0	0	0	0	0	1	1
GN4-8	GN (H)	0	0	1	1	0	1	1	1
GN4-9	GN (H)	0	0	1	0	0	1	1	1
GN4-10	GN (H)	0	1	0	0	0	1	1	1
GN4-11	GN (H)	0	0	0	0	0	1	1	1
GN4-12	GN (H)	0	1	0	1	0	1	1	1
GN4-13	GN (H)	0	1	0	0	0	1	1	1
GN4-14	GN (H)	0	0	1	0	0	1	1	1
GN4-17	GN (H)	0	0	0	0	0	0	1	1
GN4-18	GN (H)	0	0	0	0	0	0	1	1
GN4-19	GN (H)	0	0	0	0	0	1	1	1
GN4-20	GN (H)	0	0	0	0	0	0	1	1
GN4-21	GN (H)	0	1	1	1	0	1	1	1
GN4-22	GN (H)	0	0	1	1	0	1	1	1
GN4-23	GN (H)	0	0	0	0	1	1	1	1
GN4-24	GN (H)	0	1	1	1	1	1	1	1
GN5-1	GN (H)	0	0	0	1	0	0	1	1
GN5-2	GN (H)	0	1	0	0	0	0	1	1
GN5-3	GN (H)	0	0	1	1	0	1	1	1
GN5-4	GN (H)	0	1	0	0	0	1	1	1
GN5-5	GN (H)	0	1	0	1	0	1	1	1
GN5-6	GN (H)	0	0	1	0	0	1	1	1
GN5-7	GN (H)	0	1	0	0	0	1	1	1
GN5-8	GN (H)	0	1	0	0	0	1	1	1
GN5-9	GN (H)	0	0	1	0	0	1	1	1
GN5-10	GN (H)	0	0	0	0	0	0	1	1
GN5-11	GN (H)	0	0	0	0	0	0	1	1
GN5-12	GN (H)	0	0	0	0	0	0	1	1
GN5-13	GN (H)	0	1	0	1	0	1	1	1
GN5-14	GN (H)	0	0	0	0	0	1	1	1
GN5-15	GN (H)	0	0	0	0	0	0	1	1
GN5-17	GN (H)	0	0	0	0	0	1	1	1
GN5-18	GN (H)	0	1	0	0	0	0	1	1
GN5-19	GN (H)	0	0	0	1	0	0	1	1
GN5-20	GN (H)	0	0	0	1	0	1	1	1
GN5-21	GN (H)	0	1	1	1	0	1	1	1
GN5-22	GN (H)	0	1	0	1	0	0	1	1
GN6-1	GN (H)	0	1	1	0	0	1	1	1
GN6-2	GN (H)	0	0	1	1	0	1	1	1
MP65-1	MP (H)	0	0	1	1	0	1	1	1
MP66-2	MP (H)	0	0	0	0	0	1	1	1
MP1029	MP (H)	0	0	1	1	0	1	1	1
MP1029-1	MP (H)	0	0	0	0	0	1	1	1
MP14115	MP (H)	0	0	1	0	1	1	1	1
MP14116	MP (H)	0	0	0	1	0	1	1	1
MP14116-1	MP (H)	0	0	1	0	0	1	1	1
MP14615	MP (H)	0	0	1	1	0	1	1	1
MP14616	MP (H)	0	0	0	0	0	1	0	1
MP14616-1	MP (H)	0	0	0	1	0	1	0	1
MP14617	MP (H)	0	0	0	0	0	0	1	1
MP14617-1	MP (H)	0	0	0	0	0	0	1	1
MP14617-2	MP (H)	0	0	1	0	1	0	1	1
MP14618	MP (H)	0	0	1	1	0	1	1	1
MP14630	MP (H)	0	0	0	0	0	0	1	1
MP1471-1	MP (H)	0	0	0	0	0	0	1	1
MP1471-2	MP (H)	0	0	1	1	0	0	1	1
MP14711	MP (H)	0	0	0	0	0	1	1	1
MP14711-1	MP (H)	0	0	0	1	0	1	1	1
MP14811	MP (H)	0	0	1	1	0	1	1	1
MP14812	MP (H)	0	0	0	1	0	0	1	0
MP14614	MP (H)	0	0	1	0	0	0	1	1
YN1	MP (H)	0	0	0	0	0	1	1	1
YN2	MP (H)	0	0	1	1	0	1	1	1
YN3	MP (H)	0	1	1	0	0	0	1	1
YN4	MP (H)	0	0	0	0	0	1	1	1
YN5 (141031-1)	MP (H)	0	0	1	0	0	1	1	1
YN6 (141031-2)	MP (H)	0	1	0	1	0	1	1	1
YN7	MP (H)	0	1	1	0	0	1	1	1
YN8	MP (H)	0	0	0	0	0	1	1	1
YN9	MP (H)	0	1	0	0	0	0	1	1
MP_SS1	MP (H)	1	1	1	0		1	1	1
MP_SS2	MP (H)	0	0	0	0	0
MP_SS3	MP (H)	0	0	1	1	0	1	1	1
MP_SS4	MP (H)	1	0	0	1	0	1	1	1
MP_SS5	MP (H)	0	0	1	1	0	1	1	1
MP_SS6	MP (H)	0	0	1	0	0	1	1	1
MP_SS7	MP (H)	0	0	0	1	0	0	1	1
MP_SS10	MP (H)	0	0	1	1	0	1	1	1
MP_SS11	MP (H)	0	0	1	1	1	1	1	1
MP_SS13	MP (H)	0	0	1	0	0	1	1	1
MP_SS14	MP (H)	0	0	0	0	0	1	1	1
MP_SS15	MP (H)	0	0	1	1	0	1	1	1
MP_SS16	MP (H)	0	0	1	1	0	1	1	1
MP150611	MP (H)	0	0	0	0	0	0	1	1
150711-1	MP (H)	0	0	0	1	0	1	1	1
150711-2	MP (H)	1	0	1	0	0	1	1	1
150711-3	MP (H)	0	0	0	0	0	1	1	1
MW-1	MP (H)	0	0	0	0		1	1	1
MW-2	MP (H)	0	1	0	0	0	1	1	1
SC1	SC (H)	0	0	1	0	0	1	1	1
SC3	SC (H)	0	1	0	0	0	1	1	1
SC4	SC (H)	0	0	0	0	0	1	1	1
SC7	SC (H)	0	0	0	0	0	1	1	1
SC9	SC (H)	0	0	1	0	0	1	1	1
SC10	SC (H)	0	0	1	1	0	1	1	1
SC11	SC (H)	0	0	1	0	0	1	1	1
SC418-1	SC (H)	0	1	0	0	0	0	1	0
SC418-2	SC (H)	0	0	0	1	0	0	1	0
SC421-1	SC (H)	0	1	0	0	0	1	1	1
SC421-2	SC (H)	0	0	1	0	0	1	1	1
SC422-1	SC (H)	0	1	0	0	0	0	1	1
SC424-1	SC (H)	0	1	1	0	0	1	1	1
SC424-2	SC (H)	0	0	0	1	0	1	1	1
SC424-3	SC (H)	0	0	0	1	0	0	1	1
SC425-1	SC (H)	0	0	0	0	0	0	1	1
SC428-1	SC (H)	0	1	0	0	0	1	1	1
SC429-1	SC (H)	0	0	0	0	0	1	1	1
SC429-2	SC (H)	0	0	0	0	0	1	1	1
SC429-3	SC (H)	0	0	0	1	0	0	1	1
SC050901	SC (H)	0	0	1	0	0	1	1	1
SC-H1	SC (H)	0	0	0	0	0	1	1	1
SC-H2	SC (H)	0	0	0	1	0	1	1	1
SC150529_1	SC (H)	0	0	0	1	0	1	1	1
SC-H3	SC (H)	0	0	1	0	0	1	1	1
SC-H4	SC (H)	0	1	0	1	0	0	1	1
SC-H5	SC (H)	0	0	0	0	0	1	0	1
SC-H6	SC (H)	0	0	0	1	0	0	1	0
SC-H7	SC (H)	0	1	0	0	0	1	1	1
SC-H8	SC (H)	1	1	0	1	1	1	1	1
SC-H9	SC (H)	1	1	0	0	1	0	1	1
SC150703	SC (H)	0	0	0	0	0	1	0	1
BB001	SC (H)	0	0	1	0	0	1	1	1
BB002	SC (H)	0	1	1	0	0	1	1	1
BB003	SC (H)	0	0	1	1	0	1	0	1
BB004	SC (H)	0	0	1	1	0	1	1	1
BB005	SC (H)	0	0	0
BB006	SC (H)	0	0	1	1	0	1	1	1
BB007	SC (H)	0	1	0	0	0	1	1	1
BB008	SC (H)	0	0	1	1	0	1	1	1
BB009	SC (H)	0	0	1	0	1	1	1	1
BB010	SC (H)	0	0	0	0	0	0	1	1
SC-718-1	SC (H)	0	0	1	0	0	1	1	1
SC-718-2	SC (H)	1	1	0	1	0	0	1	0
SC-150731-1	SC (H)	0	1	0	0	0	0	1	1
SC-150731-2	SC (H)	0	1	1	0	0	1	1	1
SC-150731-3	SC (H)	0	0	0	0	0	1	1	1
YG1	SC (H)	0	1	1	0	0	1	1	1
YG2	SC (H)	0	1	1	0	0	1	1	1
YG3	SC (H)	0	0	0	0	0	1	1	1
YG4	SC (H)	0	1	0	0	0	1	1	1
SD-1105	SD (L)	0	0	1	1	1	1	1	1
SD-KM1103	SD (L)	0	0	0	0	0	1	1	1
sd26	SD (L)	0	1	0	0	0	1	1	1
sd27	SD (L)	0	0	0	1	0	1	1	1
sd28	SD (L)	0	1	1	0	0	1	1	1
sd30	SD (L)	0	0	0	1	0	0	1	1
sd31	SD (L)	0	0	0	0	0	1	1	1
SD32	SD (L)	0	0	1	0	1	1	1	1
SD33	SD (L)	0	0	0	0	1	0	1	1
SD34	SD (L)	0	0	1	1	0	1	1	1
SD35	SD (L)	0	0	1	0	0	1	1	1
SD36	SD (L)	0	0	0	0	0	1	1	1
SD37	SD (L)	0	1	0	0	0	1	1	1
SD38	SD (L)	0	0	0	0	0	1	1	1
SD39	SD (L)	0	1	0	1	0	1	1	1
SD40	SD (L)	0	1	0	0	0	1	1	1
SD41	SD (L)	0	0	0	0	0	1	1	1
SD42	SD (L)	0	0	1	0	0	1	1	1
SD57	SD (L)	0	0	0	0	0	1	1	1
SD60	SD (L)	0	0	1	1	0	1	1	1
SD61	SD (L)	0	0	1	0	0	1	1	1
SD63	SD (L)	0	0	0	0	0	1	1	1
SD64	SD (L)	1	0	0	0	0	1	1	0
SD65	SD (L)	0	0	0	0	0	1	1	1
SD66	SD (L)	0	0	0	0	0	1	1	0
SD67	SD (L)	0	0	1	0	0	0	1	1
SD68	SD (L)	0	1	0	0	0	1	1	0
SD71	SD (L)	0	0	1	0	1	1	1	0
SD72	SD (L)	0	0	0	0	0	1	1	1
SD73	SD (L)	0	1	0	1	0	1	1	1
SD74	SD (L)	0	0	0	0	0	1	1	1
SD75	SD (L)	0	0	1	0	0	1	1	1
SD76	SD (L)	0	0	0	0	0	1	1	1
SD77	SD (L)	0	0	0	0	0	1	1	1
SD78	SD (L)	0	0	0	0	0	1	1	0
SD79	SD (L)	0	0	0	1	0	1	1	1
SD80	SD (L)	0	0	0	1	0	1	1	1
SD81	SD (L)	0	0	0	1	0	0	1	0
SD82	SD (L)	0	0	0	0	0	1	1	1
SD85	SD (L)	0	0	0	0	0	1	1	1
SD86	SD (L)	0	0	0	0	0	1	1	1
SD87	SD (L)	0	0	0	0	0	0	1	0
SD88	SD (L)	0	0	1	1	1	1	1	1
SD89	SD (L)	0	0	1	0	0	1	1	1
SD90	SD (L)	0	0	0	1	0	1	1	1
SD91	SD (L)	0	0	1	1	0	1	1	1
SD92	SD (L)	0	0	0	1	1	1	1	1
SD93	SD (L)	0	0	0	0	0	1	1	1
SD94	SD (L)	0	0	0	0		1	1	1
SD95	SD (L)	0	0	0	0		1	1	1
SD55	SD (L)	0	1	0	0	0
SD56	SD (L)	0	0	0	1	0

## Sheet: SES_PCA data
District	Matriculation rate	Property tax	no. of respondents	subjective evaluation	*1. caring cat no. > 10	*2. experience years >5	*3. regular feeding	*4. feeding range >100m	PC1
GC	0.17	35340	20	1.85	0.15	0.2	0.5	0.35	-3.20136
SD	0.25	53050	21	2.14	0.048	0.095	0.428571	0.428571	-2.2405
GB	0.17	26457	35	2.94	0.2	0	0.628571	0.542857	-1.7449
DDM	0.24	47899	27	2.7	0.074	0	0.555556	0.592593	-1.45114
EP	0.21	44960	51	2.84	0.078	0.157	0.54902	0.392157	-1.17309
JooR	0.17	33294	30	3.83	0.133	0.133	0.633333	0.566667	-1.11462
SDM	0.27	39279	30	3.13	0.133	0.2	0.533333	0.466667	-0.792271
DB	0.22	28101	38	3.08	0.158	0.132	0.710526	0.605263	-0.782661
GR	0.24	52376	33	3.12	0.121	0.121	0.575758	0.575758	-0.709544
SB	0.25	49498	32	2.69	0.25	0.125	0.53125	0.59375	-0.642728
YC	0.27	61153	40	3.43	0.075	0.05	0.425	0.4	-0.631582
GS	0.24	73071	45	3.02	0.111	0.067	0.644444	0.577778	-0.343123
GJ	0.27	49428	46	3.09	0.109	0.13	0.586957	0.608696	0.0470345
JR	0.28	69288	49	3.45	0.122	0.061	0.510204	0.489796	0.186036
NW	0.26	47339	53	3.79	0.113	0.057	0.433962	0.490566	0.205904
GD	0.26	70652	24	4.67	0.208	0.167	0.5	0.458333	0.211959
DJ	0.32	50646	50	2.92	0.1	0.14	0.6	0.58	0.438437
YDP	0.28	86035	43	3	0.279	0.279	0.44186	0.488372	0.480888
GA	0.29	47730	69	3.26	0.159	0.116	0.652174	0.521739	0.889332
YS	0.29	75175	53	4.04	0.245	0.075	0.528302	0.509434	1.14249
MP	0.3	73134	59	4.08	0.169	0.186	0.627119	0.508475	1.46128
SP	0.33	172850	53	3.62	0.094	0.17	0.54717	0.528302	1.86167
SC	0.41	195221	64	4.17	0.172	0.156	0.515625	0.625	3.89159
GN	0.4	328451	58	3.98	0.121	0.121	0.5	0.534483	4.01091
*1-4: proportion of respondents
